# Supplementary material for: Integration of metabolic and inflammatory mediator profiles as a potential prognostic approach for septic shock in the intensive care unit
Source: Springer Nature journal article supplement (doi:10.1186/s13054-014-0729-0), 2015-01-09

# A) Metabolomics dataset

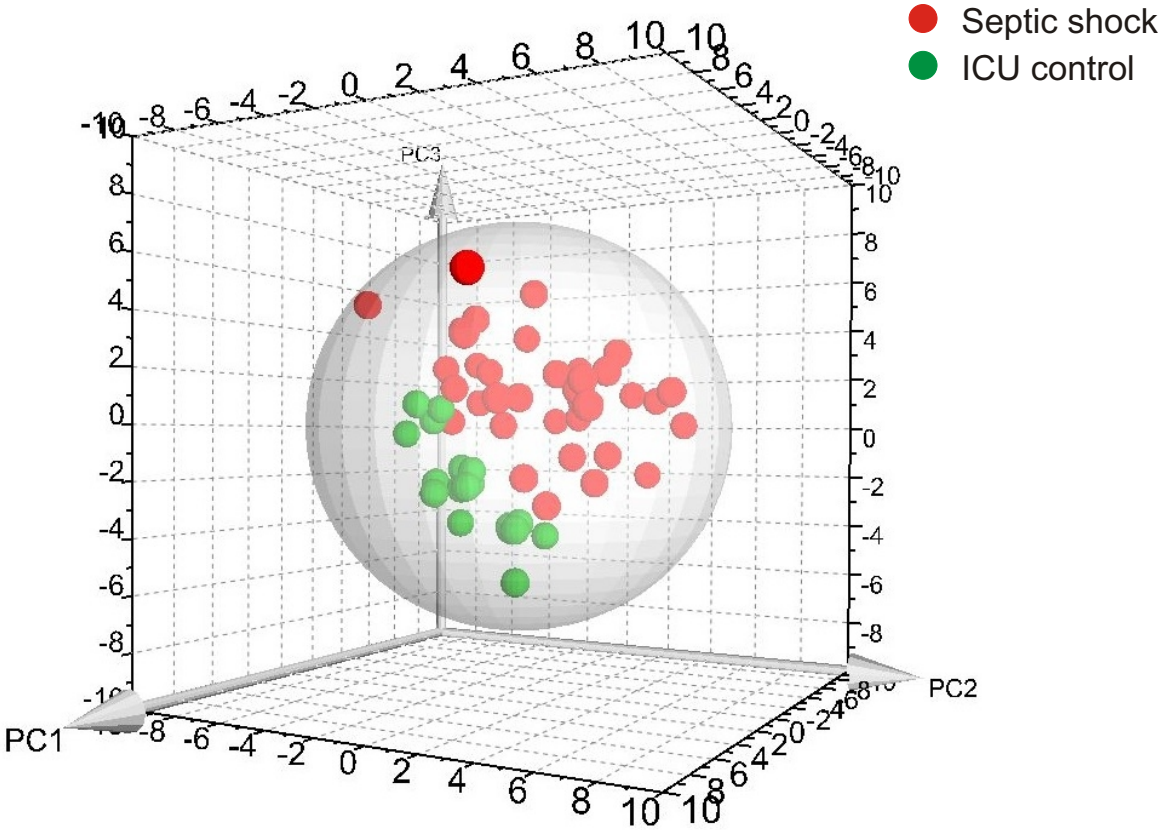

# B) Cytokine/chemokine dataset

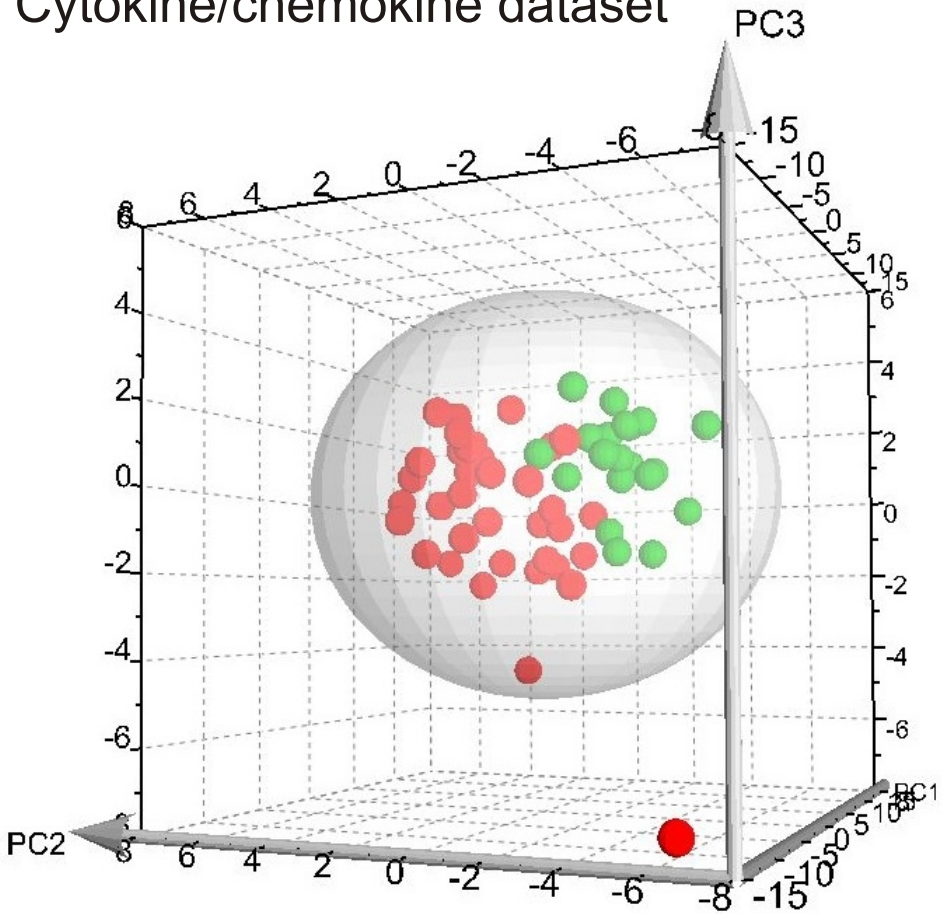

Supplement: MOESM1 [file 9780070]
