# Supplementary material for: Integration of metabolic and inflammatory mediator profiles as a potential prognostic approach for septic shock in the intensive care unit
Source: Springer Nature journal article supplement (doi:10.1186/s13054-014-0729-0), 2015-01-09
Supplement: MOESM3 [file 9780070]

| OPLS-DA model           | Outliers included            | Outliers excluded (see manuscript) |
|-------------------------|------------------------------|------------------------------------|
| Metabolomics data       | $R^2Y = 0.76$ ; $Q^2 = 0.68$ | $R^2Y = 0.75$ ; $Q^2 = 0.68$       |
| Cytokine/chemokine data | $R^2Y = 0.72$ ; $Q^2 = 0.61$ | $R^2Y = 0.74$ ; $Q^2 = 0.66$       |
| Combined dataset        | $R^2Y = 0.85$ ; $Q^2 = 0.72$ | $R^2Y = 0.85$ ; $Q^2 = 0.74$       |
