# Supplementary material for: Integration of metabolic and inflammatory mediator profiles as a potential prognostic approach for septic shock in the intensive care unit
Source: Springer Nature journal article supplement (doi:10.1186/s13054-014-0729-0), 2015-01-09

# A) Septic shock versus ICU controls

## Metabolomics data

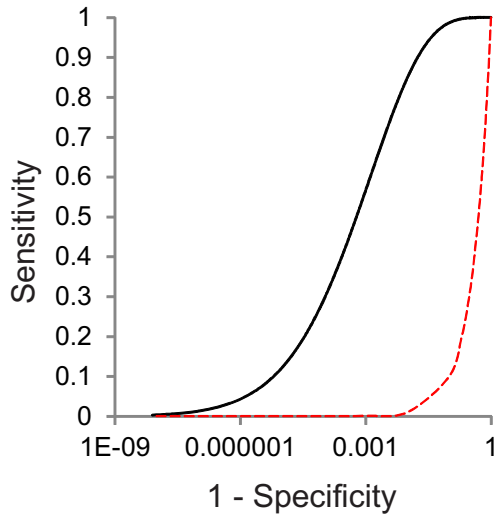

## Cytokine/chemokine data

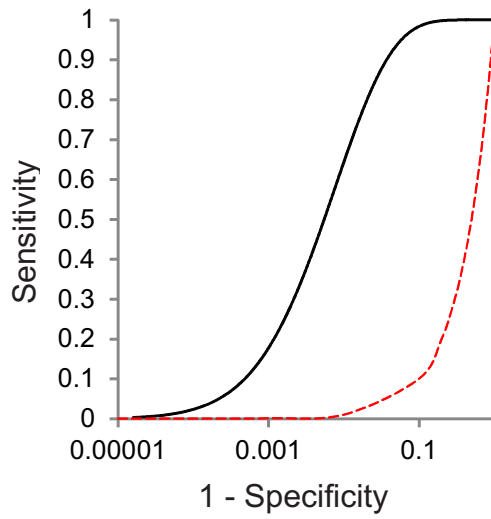

## Combined dataset

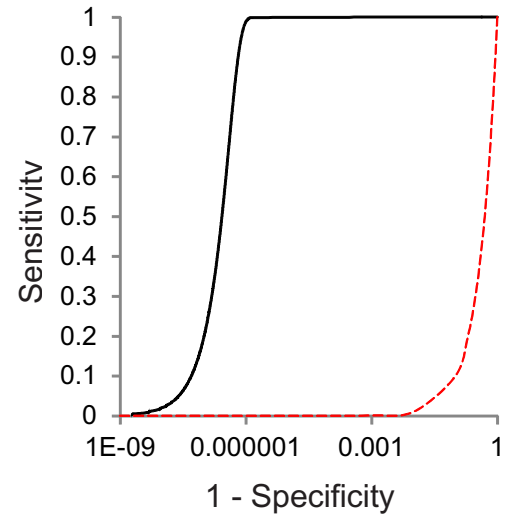

## APACHE

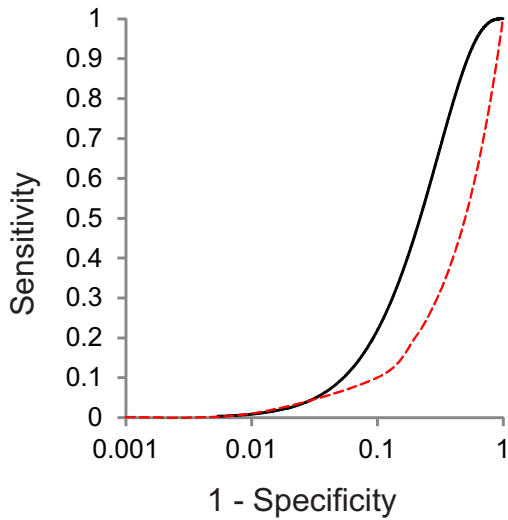

## SOFA

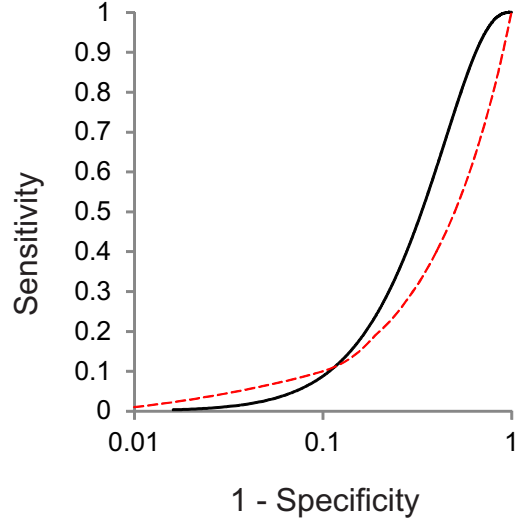

# B) Non-survivors versus survivors

## APACHE

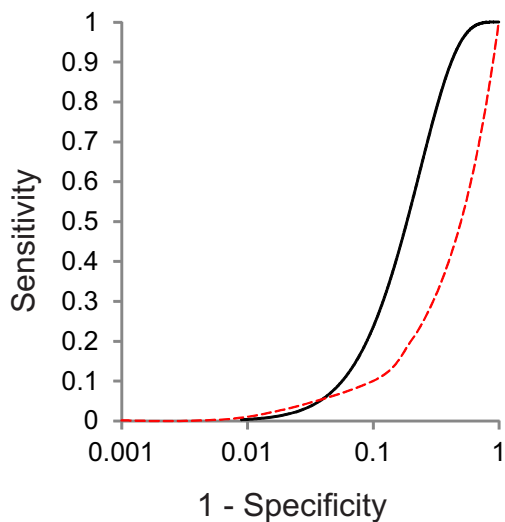

## SOFA

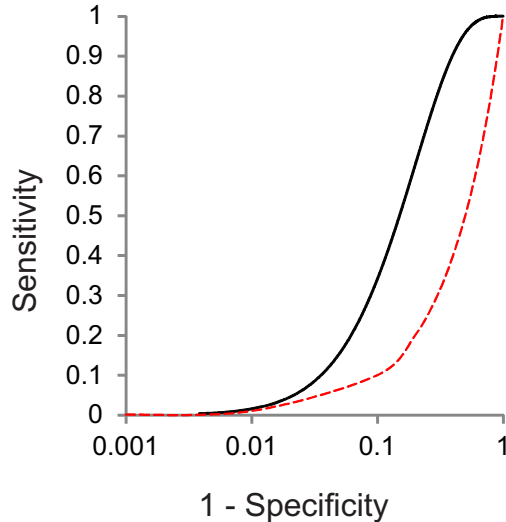

## Combined dataset

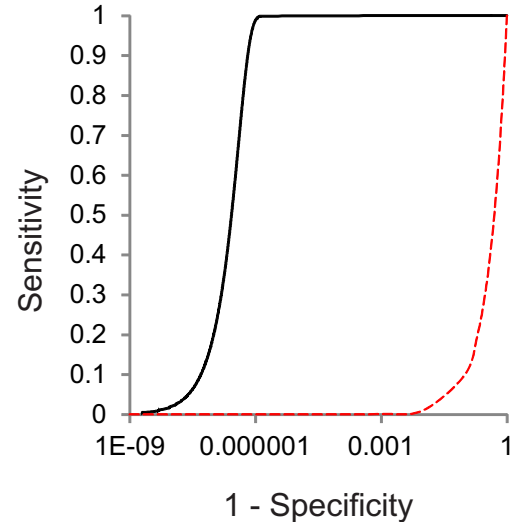

Supplement: MOESM5 [file 9780070]
